# Supplementary material for: Sequential Effects in Judgements of Attractiveness: The Influences of Face Race and Sex
Source: PubMed Central journal article supplement (PMC3857852; doi:10.1371/journal.pone.0082226), 2013-12-02
Supplement: pone.0082226.s002.pdf [file pone.0082226.s002.pdf]

**Table S2. A summary of the three experiments.**

| <b>Experiment</b> | <b>Face Block</b>                | <b>Trial Type</b>   | <b>Mean</b> | <b>SD</b> |
|-------------------|----------------------------------|---------------------|-------------|-----------|
| 1                 | White                            | Same sex            | 0.27        | 0.26      |
|                   |                                  | Opposite sex        | 0.09        | 0.23      |
|                   | Chinese                          | Same sex            | 0.17        | 0.15      |
|                   |                                  | Opposite sex        | 0.14        | 0.18      |
| 2                 | Female                           | Same race           | 0.29        | 0.25      |
|                   |                                  | Opposite race       | 0.08        | 0.27      |
|                   | Male                             | Same race           | 0.32        | 0.27      |
|                   |                                  | Opposite race       | 0.05        | 0.24      |
| 3                 | White females +<br>Chinese males | Same race + sex     | 0.44        | 0.28      |
|                   |                                  | Opposite race + sex | -0.03       | 0.29      |
|                   | White males +<br>Chinese females | Same race + sex     | 0.32        | 0.30      |
|                   |                                  | Opposite race + sex | 0.10        | 0.24      |

Mean correlations and standard deviations (SD) for all blocks and trial types, for each experiment.
